# Supplementary material for: Effects of Adult Feeding Treatments on Longevity, Fecundity, Flight Ability, and Energy Metabolism Enzymes of Grapholita molesta Moths
Source: MDPI journal article supplement (doi:10.3390/insects13080725), 2022-08-13
Supplement: s1 [file s1]

## Supplementary Materials

**Table S1.** Artificial diet formula that was used in this study.

| <b>Ingredient</b> | <b>Amounts (g)</b> |
|-------------------|--------------------|
| Maize powder      | 75                 |
| Soybean powder    | 75                 |
| Yeast powder      | 30                 |
| Tomato ketchup    | 198                |
| L-ascorbic acid   | 3                  |
| Cholesterol       | 0.1                |
| Sorbic acid       | 1                  |
| Nipagin ester     | 2                  |
| Agar              | 14                 |
| Water             | 700                |
| Sucrose           | 15                 |
